# Supplementary material
Source: publisher figshare collection journal article supplement (https://gsapubs.figshare.com/ndownloader/files/23294618)
Supplement: Supplementary file 1 [file 23294618]

## Late Pleistocene tropical Pacific temperature sensitivity to radiative greenhouse gas forcing

### SUPPLEMENTAL MATERIAL

Primary data for this study are from Ocean Drilling Program (ODP) Site 871 at the Limilok Guyot (5°33.13'N, 172°20.66'E, water depth 1255m, (Shipboard Scientific Party, 1993)). The site has a modern annual average SST of 28.8°C (Locarnini et al., 2010). One sample was taken every 3 cm downcore; ~40-60 *Globigerinoides ruber* (white) tests and 1-5 *Uvigerina* spp. Tests were picked from the 250-355 µm size fraction of each sample.

Samples of the surface mixed-layer foraminifer *G. ruber* were cleaned following established protocols including oxidation and reduction steps (e.g. Boyle and Keigwin 1985/1986; Mashiotto et al., 1999) just as in other studies (Dekens et al, 2002; Lea et al., 2000; Medina-Elizalde and Lea 2005). Mg/Ca ratios were measured using an ICP-OES at the University of California Santa Cruz; 1-σ standard deviation for repeated measurements of an internal foraminifera reference standard is 0.21 mmol/mol, or ~0.5 C°.

### Dissolution Correction

Carbonate shells preferentially lose high-Mg calcite to dissolution with depth; thus a dissolution correction for Mg/Ca must be applied to reconstruct the accurate range of tropical SST (e.g. Brown and Elderfield, 1996; Rosenthal et al., 2000). Since dissolution lowers the Mg/Ca value of the shell and the resulting temperature, one common method to correct for dissolution is to add a specified term to the temperature, depending on the degree of dissolution, commonly associated with the depth of the sediment core (Dekens et al., 2002). For example, applying a correction for dissolution to the published Mg/Ca-based temperature record from ODP Site 806 (Medina-Elizalde and Lea, 2005) using this method (Dekens et al., 2002) produces the range in temperature shown in Fig. DR1-A. Since dissolution affects the Mg/Ca values of the shell, and not the temperature directly, it is more appropriate to correct the Mg/Ca value for dissolution first, before using the exponential relationship (between Mg/Ca and temperature) to estimate temperature, similar in theory to that suggested by Rosenthal et al. (2002).

Our new dissolution correction is applied to measured Mg/Ca values in order to estimate the original surface Mg/Ca value before dissolution occurs at depth. We established a regional depth-based dissolution correction from published modern annual average SST

and core top Mg/Ca data (Broecker and Peng, 1982; Lea et al., 2000; Dekens et al., 2002) from the tropical Pacific warm pool region and create a linear ( $r^2=0.93$ ) correction for dissolution with depth (Fig. DR1-B) assuming that core-top planktonic foraminifera formed in waters directly over the core location at modern SST. Cold tongue values were excluded since dissolution within the sediments likely increases with large differences in organic matter productivity. While a linear relationship may be an oversimplification, it is a reasonable estimation over the given range of ocean depths and data available. The ‘residual’ Mg/Ca is calculated from the difference between the calculated and measured Mg/Ca values of *G. ruber* from each core top. For each coretop location, the surface Mg/Ca value was calculated using the modern surface temperature (Locarnini et al., 2010) and the Anand et al. (2003) equation of  $Mg/Ca = 0.38 e^{[0.09 \cdot SST]}$ . This equation is indistinguishable from the Dekens et al. (2002) equation at zero water depth. The Mg/Ca (residual) represents the shift in Mg/Ca value that occurs due to dissolution. A simple linear regression against water depth (Fig. DR1B), with errors, yields:

$$Mg/Ca(residual) = 0.26(\pm 0.03) * Depth(km) + 0.54(\pm 0.08).$$

The y-intercept of  $0.54 (\pm 0.08)$  implies that if we extrapolate the regression to the sea surface (zero water depth) there is significant dissolution, which contradicts the idea that dissolution is only a serious problem at depths close to the lysocline and below (Sadekov et al., 2010). However, the shallowest of the sites used in this calibration is 1.6 km; deeper than 1.6 km, the linear regression is constrained by the calibration data, but above 1.6 km, dissolution must actually decrease more quickly, perhaps non-linearly, than the regression fit implies. Thus, the application of this formula to shallow sites must be approached with caution (as explained in more detail below). We use this linear regression formula to develop a complete equation for sea-surface paleotemperature using the depth-based dissolution correction of sediment Mg/Ca to surface Mg/Ca and the exponential Mg/Ca-temperature relationship (Anand et al., 2003). The complete equation for sea-surface paleotemperature, including errors, is:

$$SST = \frac{\ln\left(\frac{Mg/Ca(surf.)}{0.38(\pm 0.02)}\right)}{0.090(\pm 0.003)},$$

where

$$Mg/Ca(surf.) = Mg/Ca(measured) + 0.26(\pm 0.03) * Depth(km) + 0.54(\pm 0.08),$$

or, for an overall equation for Mg/Ca:

$$Mg/Ca_{ruber}(mmol/mol) = -0.26(\pm 0.03) * Depth(km) - 0.54(\pm 0.08) + 0.38(\pm 0.02) * e^{0.09(\pm 0.003) * T}$$

Conceptually, this dissolution correction shifts the exponential Mg/Ca-temperature calibration curve vertically (lower) through Mg/Ca-SST-space rather than adding a (horizontal) constant temperature correction as in previous work (Fig. DR1-D). When uncertainties in the depth-dissolution regression are propagated in the temperature calibration, the dissolution correction could add up to 1.3 C° of uncertainty to the SST calculation. In this study the dissolution correction is assumed to be unchanging through time and shifts all temperature estimates by approximately the same amount. Further work is warranted to minimize this uncertainty at shallow water depths.

Since the calibration equation derived above is based on coretop data from sites that are deeper than 1.6 km, the question is: How should we then apply this calibration to data from ODP Site 871, which has a shallower water depth of 1.3 km? Our preferred method is conservative, and simply uses the original linear regression and extrapolates the core-top calibration from 1.6 km to 1.3 km water depth (Fig. DR1B). This method results in smaller amplitudes of SST (Fig. DR1-C) compared to the traditional method where an offset correction is applied to the SST values (e.g., Dekens et al., 2007, Fig. DR1-A). Furthermore, compared to other methods explained below to extrapolate the calibration to 1.3 km, this conservative method using our new calibration yields the lowest climate sensitivity values (open square in Fig. DR1-B).

Another approach to extrapolating the calibration to the depth of our core site (1.3 km) assumes that the Mg/Ca offset at zero water depth is zero (Fig. DR1B). At one extreme, this is represented by a second regression from the shallowest depth at which there is calibration data (1.6 km) and through the origin (though the artificial sudden change in slope at 1.6 km water depth seems unlikely). This yields corrected Mg/Ca values that are 0.14 mmol/mol higher than the first approach. This small difference is within the measured Mg/Ca error, suggesting that the original calibration is sufficient for this depth.

At the opposite extreme, we can assume that there was no dissolution shallower than 1.6 km (Fig. DR1B). In this case there would be no dissolution correction at ODP site 871. The resulting climate sensitivity estimates would then be higher than any formulation that attempts to correct for dissolution ( $\lambda = 1.29 \text{ }^{\circ}\text{C (W m}^{-2}\text{)}^{-1}$ ), and the estimates of previous interglacial temperatures in the western Pacific would be consistently ~2 C° cooler than modern, rendering this scenario unlikely.

The dissolution calibration also depends on the paleotemperature equation used to calculate surface Mg/Ca (from which the residual is calculated, Fig. DR1B). We tried 7 different equations (Anand et al., 2003; Elderfield and Ganssen, 2000; Hastings et al., 2001; Hendry et al., 2009; McConnell and Thunell, 2005; Pak et al., 2004; Regenberg et

al., 2009), though most cluster around the original Anand equation. Equations that do not correct for dissolution result in cooler absolute temperatures, higher glacial-interglacial amplitude of change, and higher climate sensitivity, compared to our new calibration that corrects for significant dissolution.

Overall, directly applying our new calibration equation, which assumes that the Mg/Ca-residual due to dissolution changes linearly with depth (Fig. DR1B) and extrapolates that linear relationship to 1.2 km (the depth of ODP Site 871), produces the lowest climate sensitivity values compared to other methods that either ignore dissolution or correct for dissolution using a different approach. Even these lowest estimates of climate sensitivity are higher than those predicted by models; this main point is a robust result that is not undermined by uncertainties in the dissolution correction.

In general, our new calibration has the overall effect of, given a change in measured Mg/Ca values, reducing the calculated amplitude of SST compared to the commonly used correction (Dekens et al., 2002). This difference between the dissolution corrections becomes greater at deeper water depths (Fig. DR2). Overall, our new Mg-based dissolution-corrected temperature record demonstrates the smaller amplitude of glacial-interglacial temperature change compared to other calibrations when applied to Mg/Ca records in the tropics.

When our new Mg-based dissolution correction is applied to existing long Mg/Ca records from the tropical Pacific (Site 806B and TR163-19) the resulting cold glacial temperatures are warmer than previous studies suggested while the interglacial temperatures are relatively unchanged (Fig. DR3) from published temperature estimates (Lea, 2004; Medina-Elizalde and Lea, 2005).

For this study we use the foraminifera species *Globigerinoides ruber* (white). No differentiation was made among morphotypes of *G. ruber*, though small differences have been shown to exist in Mg/Ca-SST calibrations (Steinke et al., 2005). This choice is reasonable given the morphotypes of *G. ruber* are gradational (Sadekov et al., 2008) and temperature differences among morphotypes are likely to be small (Bolton et al., 2011) in areas with a deep thermocline and minimal upwelling.

### **Tropical Climate Sensitivity Error Calculations**

Tropical climate sensitivity is determined by comparing the forcing associated with greenhouse gas concentrations (CO<sub>2</sub> and CH<sub>4</sub>) and the change in temperature at tropical ODP Site 871 (Fig. DR4). The correlation coefficient (Pearson's *r*) for the Site 871 temperature record and the atmospheric CO<sub>2</sub> record is 0.74 while the correlation for the Site 871 temperature record and the atmospheric CH<sub>4</sub> record is 0.67. Comparison of this

climate sensitivity parameter with models is made in the text under the Results and Discussion section. Error in the climate sensitivity parameter incorporates 95% confidence intervals in the dissolution correction and the RMA regressions of  $\Delta\text{SST}$  and  $\Delta\text{RF}$ . The 95% confidence interval for the resulting climate sensitivity parameter is  $0.82 - 1.11 \text{ } ^\circ\text{C (W m}^{-2}\text{)}^{-1}$ ) and for the climate sensitivity (Fig. 4) is  $3.03 - 4.12 \text{ } ^\circ\text{C}$ . The non-zero intercept in each regression (Fig. 3) is due to past interglacial timeperiods that were slightly warmer than pre-industrial temperatures (Lea, 2004; Hansen and Sato, 2011).

### **The Role of Dynamics**

While some small amount of surface temperature change at Site 871 may be due to shifts in the local temperature gradients, it is unlikely that local dynamics could have much of an impact on SST since the gradients in the western Pacific warm pool are weak, less than  $1^\circ\text{C}$  change over  $6^\circ$  of latitude (670 km). Furthermore, during the glacial periods, SST at Site 871 was warmer than at Site 806; a reversal in the direction of the gradient between the two sites cannot be explained by expansion or contraction of modern gradients. Rather it implies that dynamics, such as upwelling, may have cooled temperatures at equatorial Site 806 slightly during glacial periods. Cooler temperatures at Site 806 on the equator may support the notion that Site 871 is a more ideal location for examining western Pacific warm pool heat flux adjustments to radiative forcing.

### **Radiative Forcing Calculations**

For carbon dioxide, we use (Ramaswamy et al., 2001):

$$\Delta F_{\text{CO}_2} = 4.841 \ln ([\text{CO}_2]/[\text{CO}_2]_0) + 0.0906 (\sqrt{[\text{CO}_2]} - \sqrt{[\text{CO}_2]_0}).$$

For methane, we use (Ramaswamy et al., 2001):

$$\Delta F_{\text{CH}_4} = 0.036 (\sqrt{[\text{CH}_4]} - \sqrt{[\text{CH}_4]_0}) - [0.47 \ln \{1 + 2.01 \times 10^{-5} ([\text{CH}_4] [\text{N}_2\text{O}]_0)^{0.75} + 5.31 \times 10^{-15} [\text{CH}_4] ([\text{CH}_4] [\text{N}_2\text{O}]_0)^{1.52}\}] - [0.47 \ln \{1 + 2.01 \times 10^{-5} ([\text{CH}_4]_0 [\text{N}_2\text{O}]_0)^{0.75} + 5.31 \times 10^{-15} [\text{CH}_4]_0 ([\text{CH}_4]_0 [\text{N}_2\text{O}]_0)^{1.52}\}]$$

where  $[\text{CO}_2]_0 = 280 \text{ ppmv}$ ,  $[\text{CH}_4]_0 = 700 \text{ ppb}$ , and  $[\text{N}_2\text{O}]_0 = 280 \text{ ppb}$ .

The total radiative forcing is  $\Delta F_{\text{TOT}} = \Delta F_{\text{CO}_2} + \Delta F_{\text{CH}_4}$ . As in other studies (Lea, 2004), past changes in  $\text{N}_2\text{O}$  are ignored since  $\text{N}_2\text{O}$  has a relatively small radiative influence and lacks a continuous record.

## Time Scale

Each Mg/Ca record treated in this study is associated with a benthic  $\delta^{18}\text{O}$  record at a similar resolution from the same core. Modern bottom-water temperature at Site 871 is 3.5°C, salinity 34.5 (Locarnini et al., 2010). These  $\delta^{18}\text{O}$  records covary in time and space and are aligned with a global ‘stack’ of benthic  $\delta^{18}\text{O}$  data. For this study, we generated the benthic  $\delta^{18}\text{O}$  record for Site 871 using *Uvigerina spp.* from the same samples and size fraction as the Site 871 temperature record. From the 250-355  $\mu\text{m}$  size fraction, 1-3 individual shells were analyzed, at a resolution of one sample every 3 cm. Samples were analyzed at the University of California Stable Isotope Laboratory using a Fisons PRISM mass spectrometer with a common acid bath carbonate preparation system. Standard error for 46 measurements of an internal CM05  $\delta^{18}\text{O}$  standard was  $\pm 0.05\text{‰}$ . The benthic  $\delta^{18}\text{O}$  data from Site 806 and TR163-19 is from *Uvigerina spp.* and *C. wuellerstorfi* from previous studies (Bickert et al., 1993; Lea et al., 2002) at a similar temporal resolution. Site-specific benthic  $\delta^{18}\text{O}$  records were visually aligned (Fig. DR5) with a common timescale using glacial and interglacial maxima (Lisiecki and Raymo, 2005) with only small corrections in alignment with Analyseries software (Palliard et al., 1996).

On average the Site 871 temperature record seems to lead global benthic  $\delta^{18}\text{O}$  (LR04 stack) by about  $9(\pm 2)$  kyr at the 100-kyr frequency. At other frequencies there does not appear to be any lead between the signals. The temperature lead varies among terminations: at T-II ( $\sim 130$  kya) SST leads, though at other terminations SST and the benthic  $\delta^{18}\text{O}$  stack covary. The early temperature increase in MIS 6 is also seen at other west Pacific sites (e.g. de Villiers, 2003). The out-of-phase behavior between SST and benthic  $\delta^{18}\text{O}$  record is inconsequential to our calculation of climate sensitivity since we are comparing SST and  $\text{CO}_2$  records which are in-phase within error at orbital frequencies. The fact that all three approaches for calculating climate sensitivity provide the same result within error further suggests that the correlation with  $\text{CO}_2$  is good. To check this observation, we also removed the data prior to 150 ka, retaining the parts of the Site 871 SST record that look similar to more common tropical sites, and re-calculated the sensitivity. The result is  $\lambda = 1.08 \text{ }^\circ\text{C (W m}^{-2}\text{)}^{-1}$ , the same result as when data from Termination II is included, within error.

## Regression

The relationships for regression through temperature and radiative forcing data are developed using the Reduced Major Axis (RMA) approach (1000 iterations; Sokal and Rohlf, 2011) which is reasonable when the independent variable  $x$  is measured with error (Fig. DR6).

## SUPPLEMENTARY MATERIAL REFERENCES

- Anand, P., Elderfield, H., and Conte, M.H., 2003, Calibration of Mg/Ca thermometry in planktonic foraminifera from a sediment trap time series: *Paleoceanography*, v. 18, no. 2, doi: 10.1029/2002PA000846.
- Bickert, T., Berger, W., Burke, S., and Schmidt, H., 1993, Late Quaternary stable isotope record of *Cibicidoides wuellerstorfi* from the Ontong Java Plateau: [en.scientificcommons.org](http://en.scientificcommons.org).
- Bolton, A., Baker, J.A., Dunbar, G.B., Carter, L., Smith, E.G.C., and Neil, H.L., 2011, Environmental versus biological controls on Mg/Ca variability in *Globigerinoides ruber*(white) from core top and plankton tow samples in the southwest Pacific Ocean: *Paleoceanography*, v. 26, no. 2, p. PA2219, doi: 10.1029/2010PA001924.
- Boyle, E., and Keigwin, L., 1985, Comparison of Atlantic and Pacific paleochemical records for the last 215,000 years: Changes in deep ocean circulation and chemical inventories: *Earth and Planetary Science Letters*, v. 76, no. 1-2, p. 135–150.
- Broecker, W.S., and Peng, T.H., 1982, *Tracers in the Sea*: Lamont-Doherty Geological Observatory, Palisades, NY.
- Brown, S., and Elderfield, H., 1996, Variations in Mg/Ca and Sr/Ca ratios of planktonic foraminifera caused by postdepositional dissolution: Evidence of shallow Mg-dependent dissolution: *Paleoceanography*, v. 11, no. 5, p. 543–551.
- Dekens, P., Lea, D., Pak, D., and Spero, H., 2002, Core top calibration of Mg/Ca in tropical foraminifera: Refining paleotemperature estimation: *Geochemistry Geophysics Geosystems*, v. 3, p. 1022, doi: 10.1029/2001GC000200.
- Elderfield, H., and Ganssen, G., 2000, Past temperature and  $\delta^{18}\text{O}$  of surface ocean waters inferred from foraminiferal Mg/Ca ratios: *Nature*, v. 405, no. 6785, p. 442–445.
- Hastings, D.W., Kienast, M., Steinke, S., and Whitko, A., 2001), A comparison of three independent paleotemperature estimates from a high resolution record of deglacial SST records in the tropical South China Sea, *Eos Trans. AGU*, 82(47), Fall Meet. Suppl., Abstract PP12B-10.
- Hendry, K.R., Rickaby, R.E.M., Meredith, M.P., and Elderfield, H., 2009, Controls on stable isotope and trace metal uptake in *Neoglobobulimina pachyderma* (sinistral) from an Antarctic sea-ice environment: *Earth and Planetary Science Letters*, v. 278, no. 1-2, p. 67–77, doi: 10.1016/j.epsl.2008.11.026.

- Lea, D., 2004, The 100 000-yr cycle in tropical SST, greenhouse forcing, and climate sensitivity: *Journal of Climate*, v. 17, no. 11, p. 2170–2179.
- Lea, D., Martin, P., Pak, D., and Spero, H., 2002, Reconstructing a 350 ky history of sea level using planktonic Mg/Ca and oxygen isotope records from a Cocos Ridge core: *Quaternary Science Reviews*, v. 21, no. 1-3, p. 283–293.
- Lea, D., Pak, D., and Spero, H., 2000, Climate impact of late Quaternary equatorial Pacific sea surface temperature variations: *Science*, v. 289, no. 5485, p. 1719.
- Lisiecki, L.E., and Raymo, M.E., 2005, A Pliocene-Pleistocene stack of 57 globally distributed benthic  $\delta^{18}\text{O}$  records: *Paleoceanography*, v. 20, no. 1, p. PA1003, doi: 10.1029/2004PA001071.
- Locarnini, R., Mishonov, A., Antonov, J., Boyer, T., Garcia, H., Baranova, O., Zweng, M., and Johnson, D., 2010, World Ocean Atlas 2009, *in* Levitus, S. ed. NOAA Atlas NESDIS 68, U.S. Government Printing Office, Washington, D.C.
- Mashiotto, T., Lea, D., and Spero, H., 1999, Glacial-interglacial changes in Subantarctic sea surface temperature and  $[\delta] 18\text{O}$ -water using foraminiferal Mg: *Earth and Planetary Science Letters*, v. 170, no. 4, p. 417–432.
- McConnell, M.C., and Thunell, R.C., 2005, Calibration of the planktonic foraminiferal Mg/Ca paleothermometer: Sediment trap results from the Guaymas Basin, Gulf of California: *Paleoceanography*, v. 20, no. 2, doi: 10.1029/2004PA001077.
- Medina-Elizalde, M., and Lea, D., 2005, The mid-Pleistocene transition in the Tropical Pacific: *Science*, v. 310, no. 5750, p. 1009.
- Pak, D.K., Lea, D.W., and Kennett, J.P., 2004, Seasonal and interannual variation in Santa Barbara Basin water temperatures observed in sediment trap foraminiferal Mg/Ca: *Geochemistry Geophysics Geosystems*, v. 5, p. Q12008.
- Palliar, D., Labeyrie, L., and Yiou, P., 1996, Macintosh program performs time-series analysis: *Eos Trans. AGU* 77, 379 p.
- Ramaswamy, V., Boucher, O., Haigh, J., Hauglustaine, D., Haywood, J., Myhre, G., Nakajima, T., Shi, G., Solomon, S., and Betts, R., 2001, Radiative forcing of climate change:..
- Regenberg, M., Steph, S., Nürnberg, D., Tiedemann, R., and Garbe-Schönberg, D., 2009, Calibrating Mg/Ca ratios of multiple planktonic foraminiferal species with  $\delta^{18}\text{O}$ -calcification temperatures: Paleothermometry for the upper water column: *Earth and*



Planetary Science Letters, v. 278, no. 3-4, p. 324–336, doi: 10.1016/j.epsl.2008.12.019.

Rosenthal, Y., and Lohmann, G.P., 2002, Accurate estimation of sea surface temperatures using dissolution-corrected calibrations for Mg/Ca paleothermometry: *Paleoceanography*, v. 17, no. 3, p. 1044.

Rosenthal, Y., Lohmann, G., Lohmann, K., and Sherrell, R., 2000, Incorporation and preservation of Mg in Globigerinoides sacculifer: Implications for reconstructing the temperature and  $18\text{O}/16\text{O}$  of seawater: *Paleoceanography*, v. 15, no. 1, p. 135–145.

Sadekov, A., Eggins, S.M., De Deckker, P., and Kroon, D., 2008, Uncertainties in seawater thermometry deriving from intratest and intertest Mg/Ca variability in Globigerinoides ruber: *Paleoceanography*, v. 23, no. 1, doi: 10.1029/2007PA001452.

Sadekov, A.Y., Eggins, S.M., Klinkhammer, G.P., and Rosenthal, Y., 2010, Effects of seafloor and laboratory dissolution on the Mg/Ca composition of Globigerinoides sacculifer and Orbulina universa tests — A laser ablation ICPMS microanalysis perspective: *Earth and Planetary Science Letters*, v. 292, no. 3-4, p. 312–324, doi: 10.1016/j.epsl.2010.01.039.

Shipboard Scientific Party, 1993, Site 871, in Silva, P.I., Haggerty, J., and Rack, R. eds. *Proceedings of the Ocean Drilling Program, Initial Reports, Vol. 144, Ocean Drilling Program*, p. 105–144.

Sokal, R.R., and Rohlf, F.J., 2011, *Biometry: The Principles and Practices of Statistics in Biological Research*: W. H. Freeman, New York, NY.

Steinke, S., Chiu, H.-Y., Yu, P.-S., Shen, C.-C., Löwemark, L., Mii, H.-S., and Chen, M.-T., 2005, Mg/Ca ratios of two Globigerinoides ruber(white) morphotypes: Implications for reconstructing past tropical/subtropical surface water conditions: *Geochemistry Geophysics Geosystems*, v. 6, no. 11, p. Q11005, doi: 10.1029/2005GC000926.

de Villiers, S. (2003) Dissolution effects on foraminiferal Mg/Ca records of sea surface temperature in the western equatorial Pacific. *Paleoceanography*, **18**:3.

## SUPPLEMENTARY FIGURE CAPTIONS

**Figure DR1:** Comparison of calibration techniques using Site 806B *G. ruber* Mg/Ca record (Medina-Elizalde and Lea, 2005), which has a glacial-interglacial (G-IG) amplitude of 1.06 mmol/mol as an example. (A) Previous calibration technique correcting temperatures for dissolution by adding an offset to the derived temperature (Dekens et al., 2002) results in a G-IG amplitude of 3.2 C°. (B) The relationship between water depth and Mg/Ca residual, from core top data (filled circles) outside the Cold Tongue where dissolution may be greater. The relationship is  $\text{Mg/Ca}_{\text{residual}} = 0.26 (\pm 0.03) * \text{Depth(km)} + 0.54 (\pm 0.08)$ .  $R^2 = 0.93$ . Core top data and locations are presented in Dekens et al. (2002), Tables 1 and 4. The equation is extrapolated 12% beyond the shallowest core to the depth of Site 871 (open square). Open circles are possibilities that cannot be eliminated, though each produces even higher climate sensitivity and greater data-model mismatch. (C). The new calibration, derived in this study, to correct Mg/Ca for dissolution first before calculating paleotemperature, results in a G-IG amplitude of 2.5 C°. (D) The calibration for this study shifts the surface Mg/Ca-temperature curve vertically while other calibrations appear to shift the curve horizontally.

**Figure DR2:** Comparison of Mg/Ca-corrected calibration (this study, solid lines) and previous calibration (Dekens et al., 2002). Using the new Mg-based dissolution correction results in a smaller range of tropical Pacific glacial-interglacial temperatures for cores at any depth.

**Figure DR3:** Existing Mg/Ca records (Medina-Elizalde and Lea, 2005; Lea et al., 2000; black lines) corrected using the Mg-based dissolution correction as described (solid lines). In general, our new calibration shifts glacial temperatures toward warmer values, while interglacials remain unchanged.

**Figure S4:** Site 871 SST compared through time with atmospheric greenhouse gas concentrations. Blue and red vertical bars are glacial and interglacial times, respectively.

**Figure DR5:** Benthic  $\delta^{18}\text{O}$  records measured from Site 871, Site 806, and TR163-19 mentioned in the text compared to a global stack (Lisiecki and Raymo, 2005) for temporal alignment and age determination. Blue and red vertical bars are glacial and interglacial times, respectively. The correlation coefficient (Pearson's  $r$ ) for the Site 871 benthic  $\delta^{18}\text{O}$  record and the benthic LR04 stack is 0.79. Tie points are indicated by black diamonds.

**Figure DR6:** Regressions through data from TR163-19, Site 871, and Site 806 with regression errors plotted.

**Table DR1:** Glacial and Interglacial periods visually identified from global benthic oxygen-isotope stack (Lisiecki and Raymo, 2005).

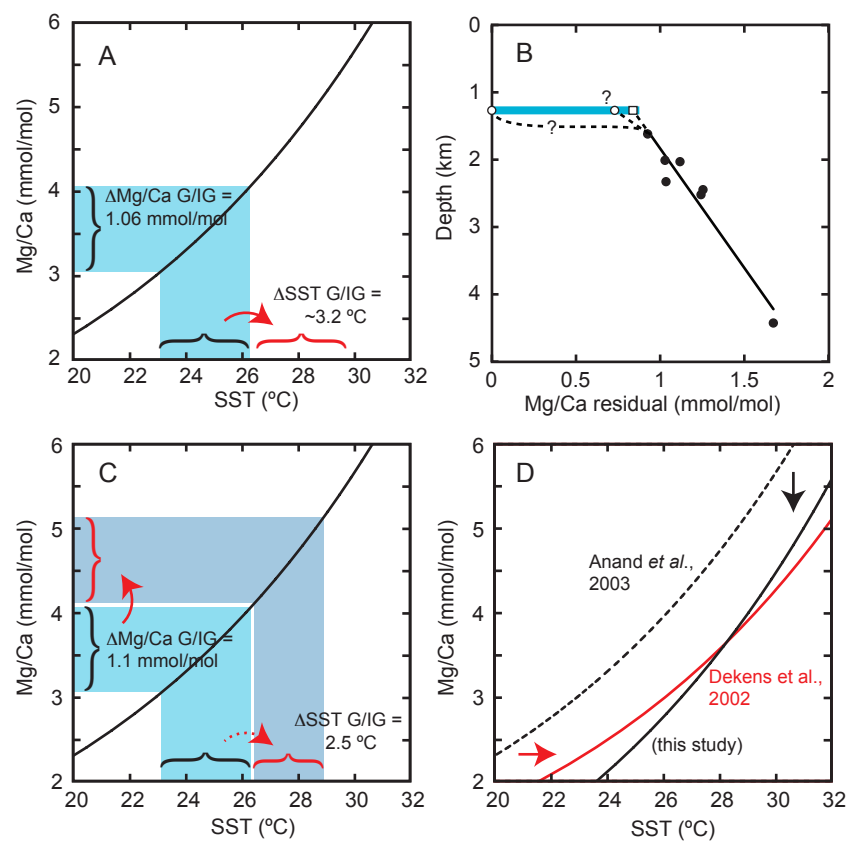

Figure DR1

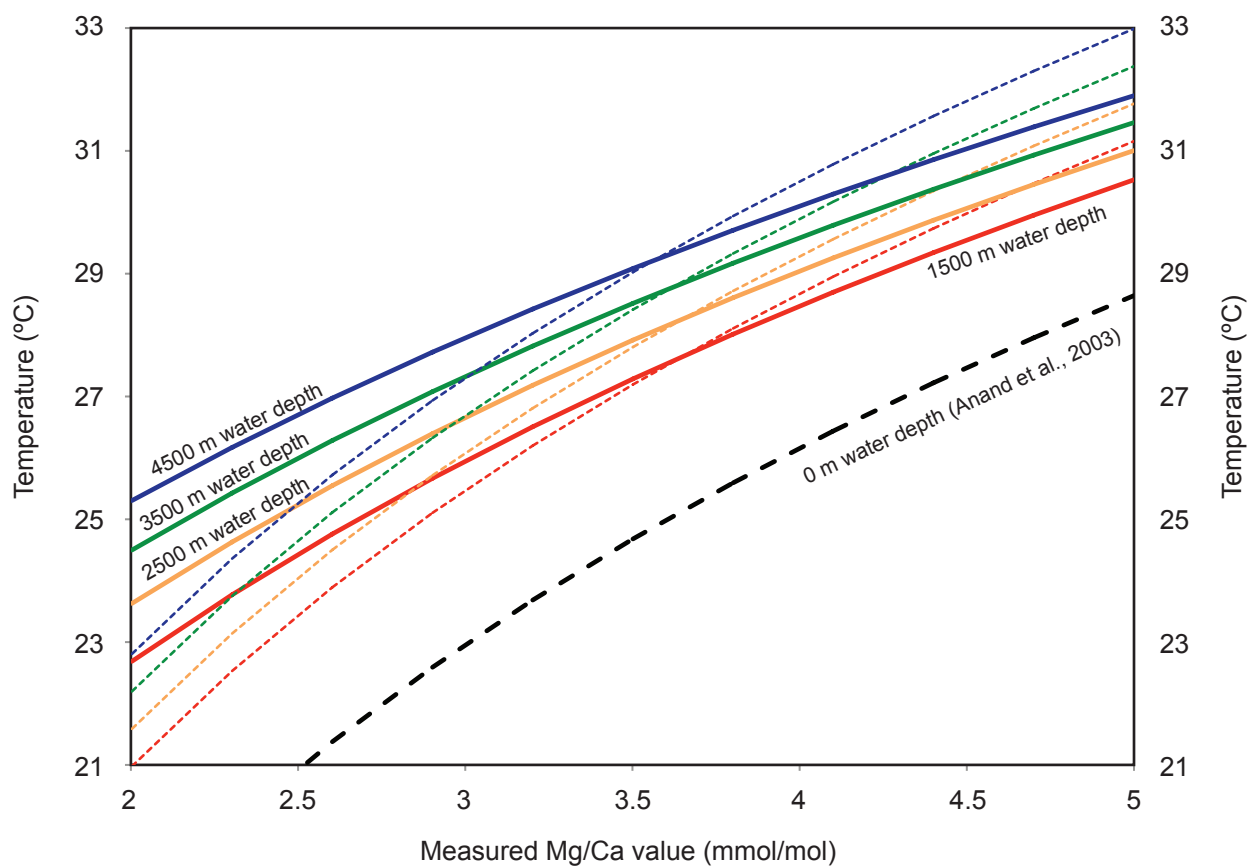

Figure DR2

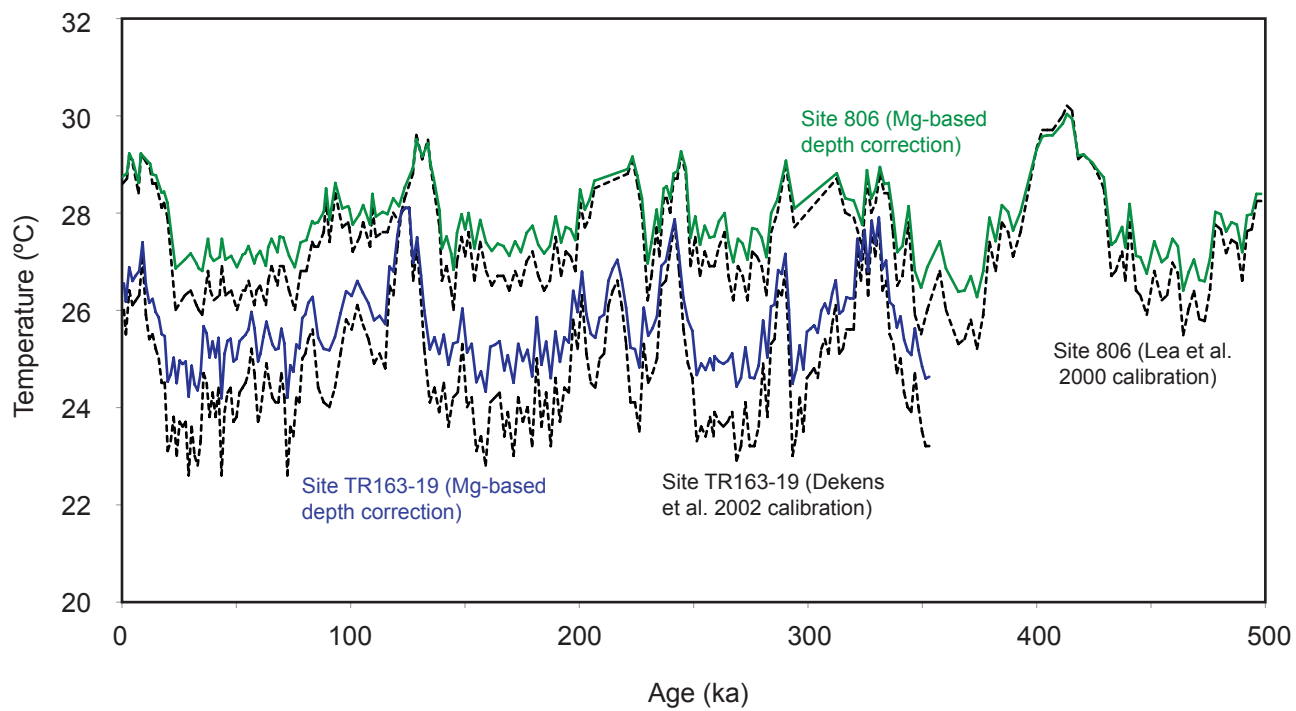

Figure DR3

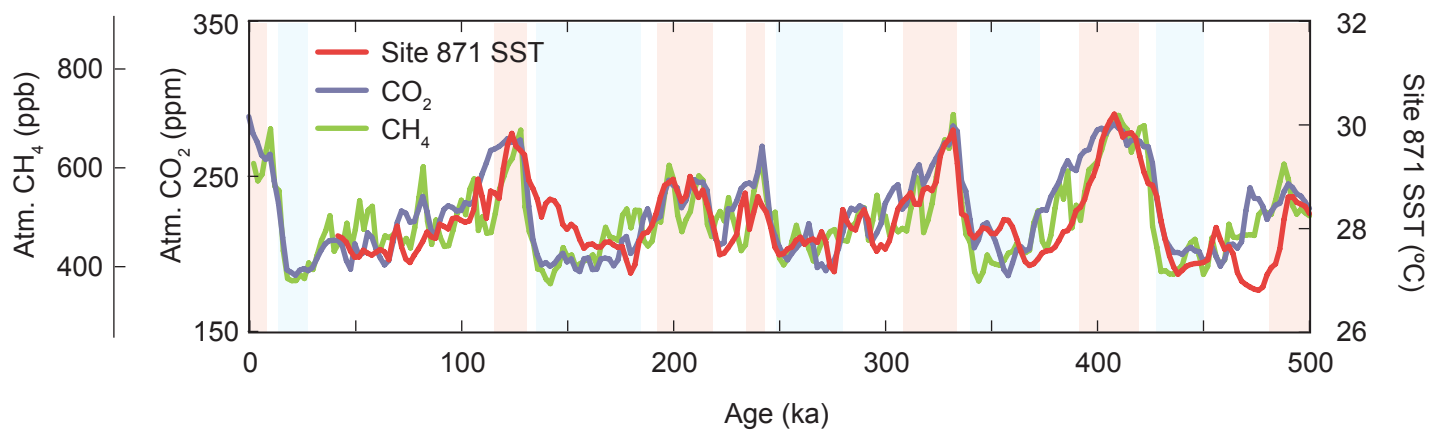

Figure DR4

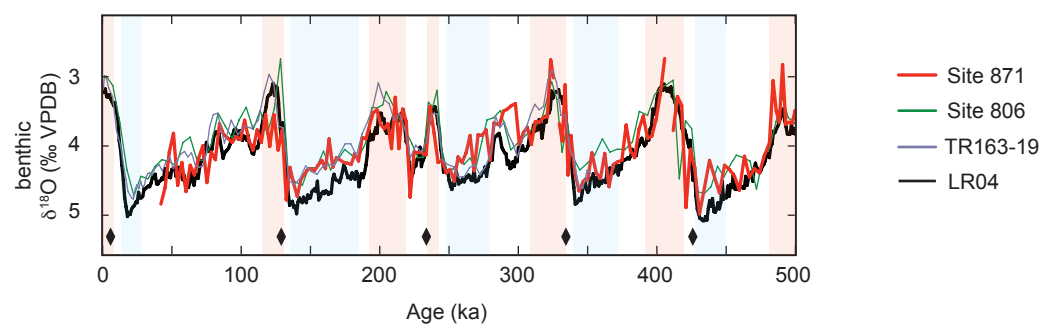

Figure DR5



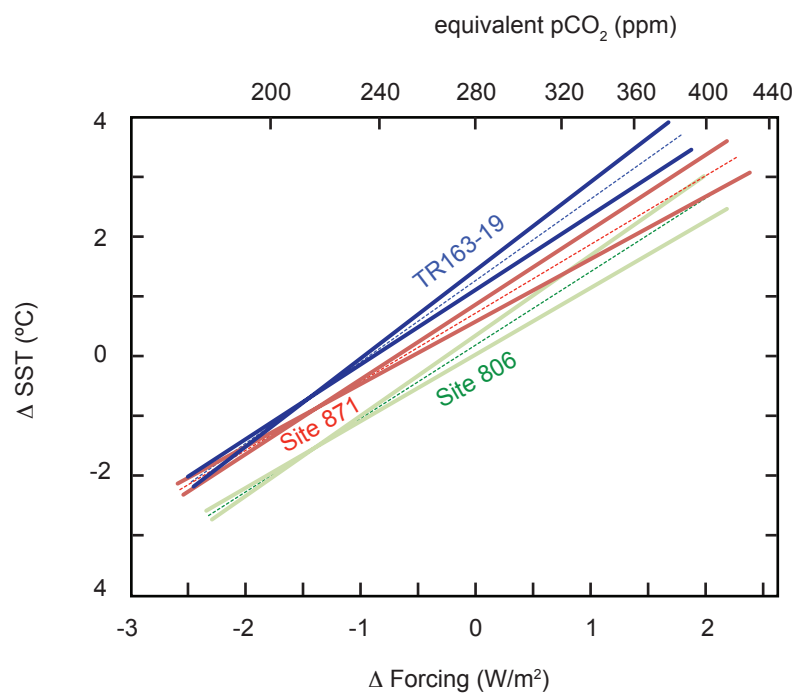

Figure DR6

Table DR1.

|            | Glacial or Interglacial period |                 |
|------------|--------------------------------|-----------------|
|            | Termination (kya)              | Inception (kya) |
| Stage 1    | 0                              | 11              |
| Stage 2    | 17                             | 28              |
| Stage 5e   | 114                            | 130             |
| Stage 6    | 135                            | 185             |
| Stage 7(a) | 192                            | 220             |
| Stage 7(b) | 234                            | 243             |
| Stage 8    | 248                            | 280             |
| Stage 9    | 308                            | 334             |
| Stage 10   | 340                            | 373             |
| Stage 11   | 391                            | 421             |
| Stage 12   | 428                            | 472             |
| Stage 13   | 482                            | 498             |

**Data Repository, ODP Site 871**

Units and Abbreviations:

mbsf (meters below sea floor)

Sample listed as: ODP Site, Hole, Core, Type, Section, Interval (cm)

d18O (Uvigerina spp. d18O (o/oo))

Age (kya)

Mg/Ca (G. ruber, white, mmol/mol)

SST (sea-surface temperature)

Blank values (N/A)

---

| mbsf | Site | Hole | Core | Type | Section | Interval |     | d18O | Age(kya) | Mg/Ca | SST  |
|------|------|------|------|------|---------|----------|-----|------|----------|-------|------|
| 0.01 | 871  | B    | 1    | H    | 1       | 1        | 3   | 4.18 | 0.00     | 3.858 | 28.0 |
| 0.04 | 871  | B    | 1    | H    | 1       | 4        | 6   | 4.35 | 2.87     | 4.072 | 28.5 |
| 0.07 | 871  | B    | 1    | H    | 1       | 7        | 9   | 4.00 | 5.89     | 3.839 | 27.9 |
| 0.1  | 871  | B    | 1    | H    | 1       | 10       | 12  | 4.08 | 8.91     | 3.962 | 28.2 |
| 0.13 | 871  | B    | 1    | H    | 1       | 13       | 15  | 3.96 | 11.93    | 4.073 | 28.5 |
| 0.16 | 871  | B    | 1    | H    | 1       | 16       | 18  | 4.43 | 14.95    | 3.669 | 27.5 |
| 0.19 | 871  | B    | 1    | H    | 1       | 19       | 21  | 3.56 | 17.97    | 3.942 | 28.2 |
| 0.22 | 871  | B    | 1    | H    | 1       | 22       | 24  | 4.18 | 20.99    | 4.109 | 28.6 |
| 0.25 | 871  | B    | 1    | H    | 1       | 25       | 27  | 4.05 | 24.01    | 3.952 | 28.2 |
| 0.28 | 871  | B    | 1    | H    | 1       | 28       | 30  | 4.41 | 27.03    | 3.621 | 27.4 |
| 0.31 | 871  | B    | 1    | H    | 1       | 31       | 33  | 4.44 | 30.05    | 3.897 | 28.1 |
| 0.34 | 871  | B    | 1    | H    | 1       | 34       | 36  | 3.29 | 33.07    | 3.867 | 28.0 |
| 0.37 | 871  | B    | 1    | H    | 1       | 37       | 39  | 4.20 | 36.09    | 4.119 | 28.6 |
| 0.4  | 871  | B    | 1    | H    | 1       | 40       | 42  | 3.61 | 39.11    | 3.944 | 28.2 |
| 0.43 | 871  | B    | 1    | H    | 1       | 43       | 45  | 4.84 | 42.13    | 3.786 | 27.8 |
| 0.46 | 871  | B    | 1    | H    | 1       | 46       | 48  | 4.60 | 45.15    | 3.784 | 27.8 |
| 0.49 | 871  | B    | 1    | H    | 1       | 49       | 51  | 4.09 | 48.16    | 3.669 | 27.5 |
| 0.52 | 871  | B    | 1    | H    | 1       | 52       | 54  | 3.82 | 51.18    | 3.610 | 27.4 |
| 0.55 | 871  | B    | 1    | H    | 1       | 55       | 57  | 4.57 | 54.20    | 3.702 | 27.6 |
| 0.58 | 871  | B    | 1    | H    | 1       | 58       | 60  | 4.24 | 57.22    | 3.639 | 27.5 |
| 0.61 | 871  | B    | 1    | H    | 1       | 61       | 63  | 4.66 | 60.24    | 3.675 | 27.6 |
| 0.64 | 871  | B    | 1    | H    | 1       | 64       | 66  | 4.28 | 63.26    | 3.705 | 27.6 |
| 0.67 | 871  | B    | 1    | H    | 1       | 67       | 69  | 4.42 | 66.28    | 3.582 | 27.3 |
| 0.7  | 871  | B    | 1    | H    | 1       | 70       | 72  | 4.18 | 69.30    | 3.948 | 28.2 |
| 0.73 | 871  | B    | 1    | H    | 1       | 73       | 75  | 4.00 | 72.32    | 3.682 | 27.6 |
| 0.76 | 871  | B    | 1    | H    | 1       | 76       | 78  | 4.53 | 75.34    | 3.570 | 27.3 |
| 0.79 | 871  | B    | 1    | H    | 1       | 79       | 81  | 4.09 | 78.36    | 3.661 | 27.5 |
| 0.82 | 871  | B    | 1    | H    | 1       | 82       | 84  | 4.20 | 81.38    | 3.730 | 27.7 |
| 0.85 | 871  | B    | 1    | H    | 1       | 85       | 87  | 3.68 | 84.40    | 3.857 | 28.0 |
| 0.88 | 871  | B    | 1    | H    | 1       | 88       | 90  | 3.84 | 87.42    | 3.741 | 27.7 |
| 0.91 | 871  | B    | 1    | H    | 1       | 91       | 93  | 3.89 | 90.44    | 3.933 | 28.2 |
| 0.94 | 871  | B    | 1    | H    | 1       | 94       | 96  | 3.95 | 93.46    | 3.829 | 27.9 |
| 0.97 | 871  | B    | 1    | H    | 1       | 97       | 99  | 3.87 | 96.48    | 3.969 | 28.3 |
| 1    | 871  | B    | 1    | H    | 1       | 100      | 102 | 3.91 | 99.50    | 3.933 | 28.2 |
| 1.03 | 871  | B    | 1    | H    | 1       | 103      | 105 | 3.63 | 102.52   | 3.907 | 28.1 |
| 1.06 | 871  | B    | 1    | H    | 1       | 106      | 108 | 3.92 | 105.53   | 3.941 | 28.2 |
| 1.09 | 871  | B    | 1    | H    | 1       | 109      | 111 | 4.06 | 108.55   | 4.380 | 29.2 |

---

| mbsf | Site | Hole | Core | Type | Section | Interval |     | d18O  | Age(kya) | Mg/Ca | SST   |
|------|------|------|------|------|---------|----------|-----|-------|----------|-------|-------|
| 1.12 | 871  | B    | 1    | H    | 1       | 112      | 114 | 3.77  | 111.57   | 3.868 | 28.0  |
| 1.15 | 871  | B    | 1    | H    | 1       | 115      | 117 | 3.95  | 114.59   | 4.266 | 28.9  |
| 1.18 | 871  | B    | 1    | H    | 1       | 118      | 120 | 3.55  | 117.61   | 4.040 | 28.4  |
| 1.21 | 871  | B    | 1    | H    | 1       | 121      | 123 | 4.01  | 120.63   | 4.473 | 29.4  |
| 1.24 | 871  | B    | 1    | H    | 1       | 124      | 126 | 3.55  | 123.65   | 4.746 | 29.9  |
| 1.27 | 871  | B    | 1    | H    | 1       | 127      | 129 | 4.06  | 126.67   | 4.533 | 29.5  |
| 1.3  | 871  | B    | 1    | H    | 1       | 130      | 132 | 3.77  | 129.69   | 4.558 | 29.5  |
| 1.33 | 871  | B    | 1    | H    | 1       | 133      | 135 | 4.78  | 132.54   | 4.198 | 28.8  |
| 1.36 | 871  | B    | 1    | H    | 1       | 136      | 138 | 4.31  | 135.19   | 4.196 | 28.8  |
| 1.39 | 871  | B    | 1    | H    | 1       | 139      | 141 | 4.54  | 137.84   | 3.912 | 28.1  |
| 1.42 | 871  | B    | 1    | H    | 1       | 142      | 144 | 4.73  | 140.49   | 4.113 | 28.6  |
| 1.45 | 871  | B    | 1    | H    | 1       | 145      | 147 | 4.48  | 143.14   | 4.100 | 28.5  |
| 1.48 | 871  | B    | 1    | H    | 1       | 148      | 150 | 4.41  | 145.79   | 4.077 | 28.5  |
| 1.5  | 871  | B    | 1    | H    | 2       | 0        | 1   | 4.35  | 147.56   | 3.898 | 28.1  |
| 1.53 | 871  | B    | 1    | H    | 2       | 3        | 4   | 4.33  | 150.21   | 3.843 | 28.0  |
| 1.56 | 871  | B    | 1    | H    | 2       | 6        | 7   | 4.36  | 152.86   | 3.922 | 28.1  |
| 1.59 | 871  | B    | 1    | H    | 2       | 9        | 10  | 4.28  | 155.51   | 3.791 | 27.8  |
| 1.62 | 871  | B    | 1    | H    | 2       | 12       | 13  | 4.21  | 158.16   | 3.685 | 27.6  |
| 1.65 | 871  | B    | 1    | H    | 2       | 15       | 16  | 4.33  | 160.81   | 3.754 | 27.7  |
| 1.68 | 871  | B    | 1    | H    | 2       | 18       | 19  | 3.90  | 163.46   | 3.714 | 27.6  |
| 1.71 | 871  | B    | 1    | H    | 2       | 21       | 22  | 4.31  | 166.11   | 3.708 | 27.6  |
| 1.74 | 871  | B    | 1    | H    | 2       | 24       | 25  | 4.17  | 168.76   | 3.768 | 27.8  |
| 1.77 | 871  | B    | 1    | H    | 2       | 27       | 28  | 3.86  | 171.41   | (N/A) | (N/A) |
| 1.8  | 871  | B    | 1    | H    | 2       | 30       | 31  | 4.24  | 174.06   | 3.704 | 27.6  |
| 1.83 | 871  | B    | 1    | H    | 2       | 33       | 34  | 4.25  | 176.71   | 3.725 | 27.7  |
| 1.86 | 871  | B    | 1    | H    | 2       | 36       | 37  | 4.27  | 179.36   | 3.494 | 27.1  |
| 1.89 | 871  | B    | 1    | H    | 2       | 39       | 40  | 4.11  | 182.00   | 3.555 | 27.3  |
| 1.92 | 871  | B    | 1    | H    | 2       | 42       | 43  | 4.22  | 184.65   | 3.829 | 27.9  |
| 1.95 | 871  | B    | 1    | H    | 2       | 45       | 46  | 3.88  | 187.30   | 3.813 | 27.9  |
| 1.98 | 871  | B    | 1    | H    | 2       | 48       | 49  | 3.90  | 189.95   | 3.878 | 28.0  |
| 2.01 | 871  | B    | 1    | H    | 2       | 51       | 52  | 3.71  | 192.60   | 4.010 | 28.3  |
| 2.04 | 871  | B    | 1    | H    | 2       | 54       | 55  | 3.52  | 195.25   | 4.220 | 28.8  |
| 2.07 | 871  | B    | 1    | H    | 2       | 57       | 58  | 3.48  | 197.90   | 4.247 | 28.9  |
| 2.1  | 871  | B    | 1    | H    | 2       | 60       | 61  | 3.69  | 200.55   | 4.295 | 29.0  |
| 2.13 | 871  | B    | 1    | H    | 2       | 63       | 64  | 3.75  | 203.20   | 4.082 | 28.5  |
| 2.16 | 871  | B    | 1    | H    | 2       | 66       | 67  | 3.68  | 205.85   | 4.099 | 28.5  |
| 2.19 | 871  | B    | 1    | H    | 2       | 69       | 70  | 4.04  | 208.50   | 4.371 | 29.1  |
| 2.22 | 871  | B    | 1    | H    | 2       | 72       | 73  | 3.30  | 211.15   | 4.075 | 28.5  |
| 2.25 | 871  | B    | 1    | H    | 2       | 75       | 76  | 4.04  | 213.80   | 4.218 | 28.8  |
| 2.28 | 871  | B    | 1    | H    | 2       | 78       | 79  | 3.47  | 216.45   | 4.035 | 28.4  |
| 2.31 | 871  | B    | 1    | H    | 2       | 81       | 82  | 3.65  | 219.10   | 3.897 | 28.1  |
| 2.34 | 871  | B    | 1    | H    | 2       | 84       | 85  | 4.74  | 221.90   | 3.628 | 27.4  |
| 2.37 | 871  | B    | 1    | H    | 2       | 87       | 88  | 4.09  | 224.78   | 3.677 | 27.6  |
| 2.4  | 871  | B    | 1    | H    | 2       | 90       | 93  | (N/A) | 227.66   | (N/A) | (N/A) |
| 2.43 | 871  | B    | 1    | H    | 2       | 93       | 94  | 4.10  | 230.55   | 3.821 | 27.9  |
| 2.46 | 871  | B    | 1    | H    | 2       | 96       | 97  | 4.13  | 233.43   | 4.281 | 28.9  |

---

| mbsf | Site | Hole | Core | Type | Section | Interval |     | d18O  | Age(kya) | Mg/Ca | SST  |
|------|------|------|------|------|---------|----------|-----|-------|----------|-------|------|
| 2.49 | 871  | B    | 1    | H    | 2       | 99       | 100 | 3.43  | 236.31   | 3.765 | 27.8 |
| 2.52 | 871  | B    | 1    | H    | 2       | 102      | 103 | 3.82  | 239.19   | 4.164 | 28.7 |
| 2.55 | 871  | B    | 1    | H    | 2       | 105      | 106 | 4.24  | 242.08   | 4.040 | 28.4 |
| 2.58 | 871  | B    | 1    | H    | 2       | 108      | 109 | 4.21  | 244.96   | 3.972 | 28.3 |
| 2.61 | 871  | B    | 1    | H    | 2       | 111      | 112 | 4.39  | 247.84   | 3.706 | 27.6 |
| 2.64 | 871  | B    | 1    | H    | 2       | 114      | 115 | 4.34  | 250.73   | 3.632 | 27.4 |
| 2.67 | 871  | B    | 1    | H    | 2       | 117      | 118 | 4.51  | 253.61   | 3.697 | 27.6 |
| 2.7  | 871  | B    | 1    | H    | 2       | 120      | 121 | 4.16  | 256.49   | 3.713 | 27.6 |
| 2.73 | 871  | B    | 1    | H    | 2       | 123      | 124 | 4.24  | 259.37   | 3.815 | 27.9 |
| 2.76 | 871  | B    | 1    | H    | 2       | 126      | 127 | 4.10  | 262.26   | 3.718 | 27.7 |
| 2.79 | 871  | B    | 1    | H    | 2       | 129      | 130 | 3.85  | 265.14   | 3.795 | 27.8 |
| 2.82 | 871  | B    | 1    | H    | 2       | 132      | 133 | 4.36  | 268.02   | 3.732 | 27.7 |
| 2.85 | 871  | B    | 1    | H    | 2       | 135      | 136 | 3.84  | 270.91   | 3.882 | 28.0 |
| 2.88 | 871  | B    | 1    | H    | 2       | 138      | 139 | 3.85  | 273.79   | 3.552 | 27.2 |
| 2.91 | 871  | B    | 1    | H    | 2       | 141      | 142 | 3.77  | 276.67   | 3.506 | 27.1 |
| 2.94 | 871  | B    | 1    | H    | 2       | 144      | 145 | 4.21  | 279.55   | 4.067 | 28.5 |
| 2.97 | 871  | B    | 1    | H    | 2       | 147      | 148 | 3.67  | 282.44   | 3.884 | 28.1 |
| 3.01 | 871  | B    | 1    | H    | 3       | 1        | 3   | 3.70  | 286.28   | 3.835 | 27.9 |
| 3.04 | 871  | B    | 1    | H    | 3       | 4        | 6   | 3.50  | 289.16   | 4.044 | 28.4 |
| 3.07 | 871  | B    | 1    | H    | 3       | 7        | 9   | 3.47  | 292.05   | 3.947 | 28.2 |
| 3.1  | 871  | B    | 1    | H    | 3       | 10       | 12  | 3.42  | 294.93   | 3.642 | 27.5 |
| 3.13 | 871  | B    | 1    | H    | 3       | 13       | 15  | 3.39  | 297.81   | 3.744 | 27.7 |
| 3.16 | 871  | B    | 1    | H    | 3       | 16       | 18  | 3.98  | 300.69   | 3.679 | 27.6 |
| 3.19 | 871  | B    | 1    | H    | 3       | 19       | 21  | 3.81  | 303.58   | 3.865 | 28.0 |
| 3.22 | 871  | B    | 1    | H    | 3       | 22       | 24  | 3.73  | 306.46   | 4.058 | 28.5 |
| 3.25 | 871  | B    | 1    | H    | 3       | 25       | 27  | 3.98  | 309.34   | 4.098 | 28.5 |
| 3.28 | 871  | B    | 1    | H    | 3       | 28       | 30  | 3.65  | 312.23   | 4.180 | 28.7 |
| 3.31 | 871  | B    | 1    | H    | 3       | 31       | 33  | 3.66  | 315.11   | 3.995 | 28.3 |
| 3.34 | 871  | B    | 1    | H    | 3       | 34       | 36  | 3.59  | 317.99   | 4.209 | 28.8 |
| 3.37 | 871  | B    | 1    | H    | 3       | 37       | 39  | 3.58  | 320.87   | 4.203 | 28.8 |
| 3.4  | 871  | B    | 1    | H    | 3       | 40       | 42  | 2.76  | 323.29   | 4.154 | 28.7 |
| 3.43 | 871  | B    | 1    | H    | 3       | 43       | 45  | 3.02  | 325.38   | 4.448 | 29.3 |
| 3.46 | 871  | B    | 1    | H    | 3       | 46       | 48  | (N/A) | 327.46   | 4.605 | 29.6 |
| 3.49 | 871  | B    | 1    | H    | 3       | 49       | 51  | 3.68  | 329.54   | 4.590 | 29.6 |
| 3.52 | 871  | B    | 1    | H    | 3       | 52       | 54  | 3.93  | 331.62   | 4.809 | 30.0 |
| 3.55 | 871  | B    | 1    | H    | 3       | 55       | 57  | 3.12  | 333.71   | 4.534 | 29.5 |
| 3.58 | 871  | B    | 1    | H    | 3       | 58       | 60  | 4.42  | 335.79   | 3.928 | 28.2 |
| 3.61 | 871  | B    | 1    | H    | 3       | 61       | 63  | 3.85  | 337.87   | 3.996 | 28.3 |
| 3.64 | 871  | B    | 1    | H    | 3       | 64       | 66  | 4.38  | 340.67   | 3.764 | 27.8 |
| 3.67 | 871  | B    | 1    | H    | 3       | 67       | 69  | 4.65  | 343.75   | 3.816 | 27.9 |
| 3.7  | 871  | B    | 1    | H    | 3       | 70       | 72  | 4.51  | 346.84   | 3.885 | 28.1 |
| 3.73 | 871  | B    | 1    | H    | 3       | 73       | 75  | 4.49  | 349.93   | 3.816 | 27.9 |
| 3.76 | 871  | B    | 1    | H    | 3       | 76       | 78  | 4.10  | 353.01   | 3.821 | 27.9 |
| 3.79 | 871  | B    | 1    | H    | 3       | 79       | 81  | 4.39  | 356.10   | 3.950 | 28.2 |
| 3.82 | 871  | B    | 1    | H    | 3       | 82       | 84  | 4.47  | 359.19   | 3.915 | 28.1 |
| 3.85 | 871  | B    | 1    | H    | 3       | 85       | 87  | 4.11  | 362.27   | 3.765 | 27.8 |

---

| mbsf | Site | Hole | Core | Type | Section | Interval |     | d18O  | Age(kya) | Mg/Ca | SST  |
|------|------|------|------|------|---------|----------|-----|-------|----------|-------|------|
| 3.88 | 871  | B    | 1    | H    | 3       | 88       | 90  | 4.59  | 365.36   | 3.608 | 27.4 |
| 3.91 | 871  | B    | 1    | H    | 3       | 91       | 93  | 4.27  | 368.45   | 3.559 | 27.3 |
| 3.94 | 871  | B    | 1    | H    | 3       | 94       | 96  | 4.23  | 371.53   | 3.606 | 27.4 |
| 3.97 | 871  | B    | 1    | H    | 3       | 97       | 99  | 4.21  | 374.62   | 3.683 | 27.6 |
| 4    | 871  | B    | 1    | H    | 3       | 100      | 102 | 3.70  | 377.71   | 3.680 | 27.6 |
| 4.03 | 871  | B    | 1    | H    | 3       | 103      | 105 | 4.07  | 380.79   | 3.722 | 27.7 |
| 4.06 | 871  | B    | 1    | H    | 3       | 106      | 108 | 4.17  | 383.88   | 3.841 | 28.0 |
| 4.09 | 871  | B    | 1    | H    | 3       | 109      | 111 | 3.76  | 386.97   | 3.846 | 28.0 |
| 4.12 | 871  | B    | 1    | H    | 3       | 112      | 114 | 3.57  | 390.05   | 4.023 | 28.4 |
| 4.15 | 871  | B    | 1    | H    | 3       | 115      | 117 | 3.89  | 393.14   | 4.047 | 28.4 |
| 4.18 | 871  | B    | 1    | H    | 3       | 118      | 120 | 3.86  | 396.23   | 4.255 | 28.9 |
| 4.21 | 871  | B    | 1    | H    | 3       | 121      | 123 | 3.62  | 399.31   | 4.342 | 29.1 |
| 4.24 | 871  | B    | 1    | H    | 3       | 124      | 126 | 3.25  | 402.40   | 4.678 | 29.8 |
| 4.27 | 871  | B    | 1    | H    | 3       | 127      | 129 | 2.74  | 405.49   | 4.807 | 30.0 |
| 4.3  | 871  | B    | 1    | H    | 3       | 130      | 132 | (N/A) | 408.57   | 4.918 | 30.2 |
| 4.33 | 871  | B    | 1    | H    | 3       | 133      | 135 | 3.78  | 411.66   | 4.649 | 29.7 |
| 4.36 | 871  | B    | 1    | H    | 3       | 136      | 138 | 3.29  | 414.75   | 4.720 | 29.9 |
| 4.39 | 871  | B    | 1    | H    | 3       | 139      | 141 | 3.42  | 417.83   | 4.692 | 29.8 |
| 4.42 | 871  | B    | 1    | H    | 3       | 142      | 144 | 4.89  | 420.92   | 4.406 | 29.2 |
| 4.45 | 871  | B    | 1    | H    | 3       | 145      | 147 | 4.05  | 424.01   | 4.228 | 28.8 |
| 4.48 | 871  | B    | 1    | H    | 3       | 148      | 150 | 4.32  | 427.09   | 4.227 | 28.8 |
| 4.51 | 871  | B    | 1    | H    | 4       | 1        | 3   | 4.98  | 430.64   | 3.864 | 28.0 |
| 4.54 | 871  | B    | 1    | H    | 4       | 4        | 6   | 4.60  | 434.24   | 3.623 | 27.4 |
| 4.57 | 871  | B    | 1    | H    | 4       | 7        | 9   | 4.21  | 437.84   | 3.490 | 27.1 |
| 4.6  | 871  | B    | 1    | H    | 4       | 10       | 12  | 4.45  | 441.44   | 3.561 | 27.3 |
| 4.63 | 871  | B    | 1    | H    | 4       | 13       | 15  | 4.68  | 445.04   | 3.584 | 27.3 |
| 4.66 | 871  | B    | 1    | H    | 4       | 16       | 18  | 4.28  | 448.64   | 3.586 | 27.3 |
| 4.69 | 871  | B    | 1    | H    | 4       | 19       | 21  | 4.34  | 452.24   | 3.603 | 27.4 |
| 4.72 | 871  | B    | 1    | H    | 4       | 22       | 24  | 4.44  | 455.84   | 3.906 | 28.1 |
| 4.75 | 871  | B    | 1    | H    | 4       | 25       | 27  | 4.64  | 459.44   | 3.684 | 27.6 |
| 4.78 | 871  | B    | 1    | H    | 4       | 28       | 30  | 4.15  | 463.04   | 3.731 | 27.7 |
| 4.81 | 871  | B    | 1    | H    | 4       | 31       | 33  | 4.45  | 466.64   | 3.469 | 27.0 |
| 4.84 | 871  | B    | 1    | H    | 4       | 34       | 36  | 4.33  | 470.24   | 3.423 | 26.9 |
| 4.87 | 871  | B    | 1    | H    | 4       | 37       | 39  | 4.39  | 473.85   | 3.391 | 26.8 |
| 4.9  | 871  | B    | 1    | H    | 4       | 40       | 42  | 4.14  | 477.45   | 3.379 | 26.8 |
| 4.93 | 871  | B    | 1    | H    | 4       | 43       | 45  | 3.96  | 481.05   | 3.549 | 27.2 |
| 4.96 | 871  | B    | 1    | H    | 4       | 46       | 48  | 3.06  | 483.70   | 3.560 | 27.3 |
| 4.99 | 871  | B    | 1    | H    | 4       | 49       | 51  | 3.50  | 485.98   | 3.676 | 27.6 |
| 5.02 | 871  | B    | 1    | H    | 4       | 52       | 54  | 3.66  | 488.26   | 3.978 | 28.3 |
| 5.05 | 871  | B    | 1    | H    | 4       | 55       | 57  | 2.83  | 490.54   | 4.179 | 28.7 |
| 5.08 | 871  | B    | 1    | H    | 4       | 58       | 60  | 3.69  | 492.82   | 4.100 | 28.5 |
| 5.11 | 871  | B    | 1    | H    | 4       | 61       | 63  | 3.66  | 495.10   | 4.061 | 28.5 |
| 5.14 | 871  | B    | 1    | H    | 4       | 64       | 66  | 3.67  | 497.38   | 4.066 | 28.5 |
| 5.17 | 871  | B    | 1    | H    | 4       | 67       | 69  | 3.49  | 499.66   | 3.992 | 28.3 |
| 5.2  | 871  | B    | 1    | H    | 4       | 70       | 72  | 3.88  | 501.95   | 3.929 | 28.2 |
| 5.23 | 871  | B    | 1    | H    | 4       | 73       | 75  | 3.83  | 504.23   | 3.912 | 28.1 |

---

| mbsf | Site | Hole | Core | Type | Section | Interval |     | d18O | Age(kya) | Mg/Ca | SST  |
|------|------|------|------|------|---------|----------|-----|------|----------|-------|------|
| 5.26 | 871  | B    | 1    | H    | 4       | 76       | 78  | 3.76 | 506.51   | 3.821 | 27.9 |
| 5.29 | 871  | B    | 1    | H    | 4       | 79       | 81  | 4.17 | 508.79   | 3.752 | 27.7 |
| 5.32 | 871  | B    | 1    | H    | 4       | 82       | 84  | 4.14 | 511.07   | 3.940 | 28.2 |
| 5.35 | 871  | B    | 1    | H    | 4       | 85       | 87  | 3.85 | 513.35   | 4.101 | 28.5 |
| 5.38 | 871  | B    | 1    | H    | 4       | 88       | 90  | 4.08 | 515.63   | 3.981 | 28.3 |
| 5.41 | 871  | B    | 1    | H    | 4       | 91       | 93  | 4.05 | 517.91   | 3.972 | 28.3 |
| 5.44 | 871  | B    | 1    | H    | 4       | 94       | 96  | 4.15 | 520.19   | 3.994 | 28.3 |
| 5.47 | 871  | B    | 1    | H    | 4       | 97       | 99  | 3.38 | 522.61   | 3.768 | 27.8 |
| 5.5  | 871  | B    | 1    | H    | 4       | 100      | 102 | 4.07 | 526.25   | 3.881 | 28.0 |
| 5.53 | 871  | B    | 1    | H    | 4       | 103      | 105 | 3.78 | 529.88   | 3.486 | 27.1 |
| 5.56 | 871  | B    | 1    | H    | 4       | 106      | 108 | 4.29 | 533.51   | 3.593 | 27.3 |
| 5.59 | 871  | B    | 1    | H    | 4       | 109      | 111 | 4.23 | 537.15   | 3.528 | 27.2 |
